# Supplementary material
Source: publisher figshare collection journal article supplement (https://acs.figshare.com/ndownloader/files/22460903)
Supplement: Supplementary file 1 [file 22460903]

[illegible]

- 2
- 3
- 4
- 5
- 6
- 7
- 8
- 9
- 0
- 1
- 2
- 3
- 4
- 5
- 6
- 7
- 8
- 9
- 0
- 1
- 2
- 3
- 4
- 5
- 6
- 7
- 8
- 9

- 3
- 4
- 5
- 6
- 7
- 8
- 9
- 0
- 1
- 2
- 3
- 4
- 5
- 6
- 7
- 8
- 9
- 0
- 1
- 2
- 3
- 4
- 5
- 6
- 7
- 8
- 9

4  
5  
6  
7  
8  
9  
0  
1  
2  
3  
4  
5  
6  
7  
8  
9  
0  
1  
2  
3  
4  
5  
6  
7  
8  
9  
0

5  
6  
7  
8  
9  
0  
1  
2  
3  
4  
5  
6  
7  
8  
9  
0  
1  
2  
3  
4  
5  
6  
7  
8  
9

6  
7  
8  
9  
0  
1  
2  
3  
4  
5  
6  
7  
8  
9  
20  
21  
22  
23  
24  
25  
26  
27  
28  
29

7  
8  
9  
0  
1  
2  
3  
4  
5  
6  
7  
8  
9  
20  
21  
22  
23  
24  
25  
26  
27  
28  
29

9  
0  
1  
2  
3  
4  
5  
6  
7  
8  
9  
20  
21  
22  
23  
24  
25  
26  
27  
28  
29

- 1
- 2
- 3
- 4
- 5
- 6
- 7
- 8
- 9
- 20
- 21
- 22
- 23
- 24
- 25
- 26
- 27
- 28
- 29

3  
4  
5  
6  
7  
8  
9  
20  
21  
22  
23  
24  
25  
26  
27  
28  
29

25  
26  
27  
28  
29

6  
7  
8  
9  
20  
21  
22  
23  
24  
25  
26  
27  
28  
29

27  
28  
29  
20  
21  
22  
23  
24  
25  
26  
27  
28  
29

28  
29  
30  
31  
32  
33  
34  
35  
36  
37  
38  
39  
40  
41  
42  
43  
44  
45  
46  
47  
48  
49  
50  
51  
52  
53  
54  
55  
56  
57  
58  
59  
60  
61  
62  
63  
64  
65  
66  
67  
68  
69  
70  
71  
72  
73  
74  
75  
76  
77  
78  
79  
80  
81  
82  
83  
84  
85  
86  
87  
88  
89  
90  
91  
92  
93  
94  
95  
96  
97  
98  
99  
100  
101  
102  
103  
104  
105  
106  
107  
108  
109  
110  
111  
112  
113  
114  
115  
116  
117  
118  
119  
120  
121  
122  
123  
124  
125  
126  
127  
128  
129  
130  
131  
132  
133  
134  
135  
136  
137  
138  
139  
140  
141  
142  
143  
144  
145  
146  
147  
148  
149  
150  
151  
152  
153  
154  
155  
156  
157  
158  
159  
160  
161  
162  
163  
164  
165  
166  
167  
168  
169  
170  
171  
172  
173  
174  
175  
176  
177  
178  
179  
180  
181  
182  
183  
184  
185  
186  
187  
188  
189  
190  
191  
192  
193  
194  
195  
196  
197  
198  
199  
200  
201  
202  
203  
204  
205  
206  
207  
208  
209  
210  
211  
212  
213  
214  
215  
216  
217  
218  
219  
220  
221  
222  
223  
224  
225  
226  
227  
228  
229  
230  
231  
232  
233  
234  
235  
236  
237  
238  
239  
240  
241  
242  
243  
244  
245  
246  
247  
248  
249  
250  
251  
252  
253  
254  
255  
256  
257  
258  
259  
260  
261  
262  
263  
264  
265  
266  
267  
268  
269  
270  
271  
272  
273  
274  
275  
276  
277  
278  
279  
280  
281  
282  
283  
284  
285  
286  
287  
288  
289  
290  
291  
292  
293  
294  
295  
296  
297  
298  
299  
300  
301  
302  
303  
304  
305  
306  
307  
308  
309  
310  
311  
312  
313  
314  
315  
316  
317  
318  
319  
320  
321  
322  
323  
324  
325  
326  
327  
328  
329  
330  
331  
332  
333  
334  
335  
336  
337  
338  
339  
340  
341  
342  
343  
344  
345  
346  
347  
348  
349  
350  
351  
352  
353  
354  
355  
356  
357  
358  
359  
360  
361  
362  
363  
364  
365  
366  
367  
368  
369  
370  
371  
372  
373  
374  
375  
376  
377  
378  
379  
380  
381  
382  
383  
384  
385  
386  
387  
388  
389  
390  
391  
392  
393  
394  
395  
396  
397  
398  
399  
400  
401  
402  
403  
404  
405  
406  
407  
408  
409  
410  
411  
412  
413  
414  
415  
416  
417  
418  
419  
420  
421  
422  
423  
424  
425  
426  
427  
428  
429  
430  
431  
432  
433  
434  
435  
436  
437  
438  
439  
440  
441  
442  
443  
444  
445  
446  
447  
448  
449  
450  
451  
452  
453  
454  
455  
456  
457  
458  
459  
460  
461  
462  
463  
464  
465  
466  
467  
468  
469  
470  
471  
472  
473  
474  
475  
476  
477  
478  
479  
480  
481  
482  
483  
484  
485  
486  
487  
488  
489  
490  
491  
492  
493  
494  
495  
496  
497  
498  
499  
500  
501  
502  
503  
504  
505  
506  
507  
508  
509  
510  
511  
512  
513  
514  
515  
516  
517  
518  
519  
520  
521  
522  
523  
524  
525  
526  
527  
528  
529  
530  
531  
532  
533  
534  
535  
536  
537  
538  
539  
540  
541  
542  
543  
544  
545  
546  
547  
548  
549  
550  
551  
552  
553  
554  
555  
556  
557  
558  
559  
560  
561  
562  
563  
564  
565  
566  
567  
568  
569  
570  
571  
572  
573  
574  
575  
576  
577  
578  
579  
580  
581  
582  
583  
584  
585  
586  
587  
588  
589  
590  
591  
592  
593  
594  
595  
596  
597  
598  
599  
600  
601  
602  
603  
604  
605  
606  
607  
608  
609  
610  
611  
612  
613  
614  
615  
616  
617  
618  
619  
620  
621  
622  
623  
624  
625  
626  
627  
628  
629  
630  
631  
632  
633  
634  
635  
636  
637  
638  
639  
640  
641  
642  
643  
644  
645  
646  
647  
648  
649  
650  
651  
652  
653  
654  
655  
656  
657  
658  
659  
660  
661  
662  
663  
664  
665  
666  
667  
668  
669  
670  
671  
672  
673  
674  
675  
676  
677  
678  
679  
680  
681  
682  
683  
684  
685  
686  
687  
688  
689  
690  
691  
692  
693  
694  
695  
696  
697  
698  
699  
700  
701  
702  
703  
704  
705  
706  
707  
708  
709  
710  
711  
712  
713  
714  
715  
716  
717  
718  
719  
720  
721  
722  
723  
724  
725  
726  
727  
728  
729  
730  
731  
732  
733  
734  
735  
736  
737  
738  
739  
740  
741  
742  
743  
744  
745  
746  
747  
748  
749  
750  
751  
752  
753  
754  
755  
756  
757  
758  
759  
760  
761  
762  
763  
764  
765  
766  
767  
768  
769  
770  
771  
772  
773  
774  
775  
776  
777  
778  
779  
780  
781  
782  
783  
784  
785  
786  
787  
788  
789  
790  
791  
792  
793  
794  
795  
796  
797  
798  
799  
800  
801  
802  
803  
804  
805  
806  
807  
808  
809  
810  
811  
812  
813  
814  
815  
816  
817  
818  
819  
820  
821  
822  
823  
824  
825  
826  
827  
828  
829  
830  
831  
832  
833  
834  
835  
836  
837  
838  
839  
840  
841  
842  
843  
844  
845  
846  
847  
848  
849  
850  
851  
852  
853  
854  
855  
856  
857  
858  
859  
860  
8

29  
20  
21  
22  
23  
24  
25  
26  
27  
28  
29

20  
21  
22  
23  
24  
25  
26  
27  
28  
29

21  
22  
23  
24  
25  
26  
27  
28  
29

22  
23  
24  
25  
26  
27  
28  
29

23  
24  
25  
26  
27  
28  
29

24  
25  
26  
27  
28  
29

25  
26  
27  
28  
29

26  
27  
28  
29

27  
28  
29

29

30 instruments

31 Text S9. Location and deployment of field observation

32 Text S10. Diurnal variations of HCHO and acetonitrile concentrations

33 Text S11. Description of the sampling and pretreatment system

34 Text S12. Test vehicles

35

36 **Tables:**

37 Table S1. Interferences from acetaldehyde, acetone and ethanol.

38 Table S2. Comparison of the Hantzsch-Abs and other commercial instruments

39 Table S3. Specifications of the test vehicles.

40

41 **Figures:**

42 Figure S1. Construction of the glass stripping coil.

43 Figure S2. Signal response versus different ratios of liquid flow rate between of  
44 stripping solution,  $F_1$  (SS) and derivatization solution,  $F_1$  (DS).

45 Figure S3. Signal response versus temperature of the reactor.

46 Figure S4. Calibration of the Hantzsch-Abs by HCHO standard solutions.

47 Figure S5. Liquid phase system performance by switching the HCHO solutions and  
48 stripping solution.

49 Figure S6. Calibration curves under different lengths of reactor cell.

50 Figure S7. Siting of field measurement.

51 Figure S8. Containers of field measurement.

52 Figure S9. Diurnal variations of HCHO and acetonitrile concentrations during  
53 December 15 and December 21.

54 Figure S10. System schematic for the sampling and dilution system

55

56

## 57    **Text S1. Measurement principle**

58        The basic chemical principles of the Hantzsch-Abs are based on the Hantzsch  
59        reaction (R1) and absorption photometry. In brief, liquid-phase HCHO reacts with  
60        acetyl acetone and ammonia to produce 3,5-diacetyl-1,4-dihydrolutidine (DDL), which  
61        specifically absorbs light at 415 nm.

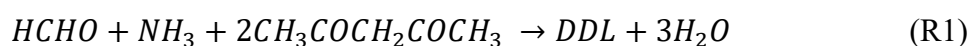

## 62    **Text S2. System description and operation**

| <b>Abbreviations:</b> |                                  |                    |                                                                  |
|-----------------------|----------------------------------|--------------------|------------------------------------------------------------------|
| <b>SS</b>             | Stripping solution;              | <b>OF1 and OF2</b> | Optical fibers                                                   |
| <b>DS</b>             | Derivatization solution          | <b>MC</b>          | Insulated metal capsule equipped with temperature-control device |
| <b>SC</b>             | Stripping coil                   | <b>MP1 to MP4</b>  | Micro solenoid pumps for liquid handling                         |
| <b>CD</b>             | Cooling device for cycling water | <b>WT</b>          | Water trap                                                       |
| <b>HR</b>             | Heated reactor                   | <b>WF</b>          | Water filter                                                     |
| <b>DB</b>             | Debubbler                        | <b>MFC</b>         | Mass flow controller for air sampling                            |
| <b>LWCC</b>           | Liquid Waveguide Capillary Cell  | <b>AP</b>          | Air pump                                                         |
| <b>LS</b>             | Light source                     | <b>MT</b>          | Mixing tee                                                       |
| <b>PD</b>             | Photodiode detector              | <b>SP</b>          | Syringe pump for waste handling                                  |

63 The zero air is provided by passing the ambient air through a filter cartridge  
64 containing a Hopkalit catalyst during baseline monitoring and calibration (not shown  
65 in Figure 1). All the tubes for gas are made up by 1/4'' Teflon tubes while those for  
66 solutions are by 1/16'' Teflon tubes. The Hantzsch-Abs consists of five modules  
67 including the sampling module, the reaction module, the detection module, the liquid  
68 delivery module, and the data acquisition and system control module. The whole system  
69 is contained in a case machined from an aluminum block (440×440×130 mm).

70 The data acquisition and system control module includes two 5V power supplies  
71 (LRS-350-5, MEAN WELL ELECTRONICS CO., LTD.), a 12V power supply (LRS-  
72 350-12, MEAN WELL ELECTRONICS CO., LTD.), a main control circuit board, a  
73 data acquisition and storage circuit board and a 7-inch touch panel coupled with a 32-  
74 bit ARM Microcontroller (CortexM3 STM32F103VET6). The touch panel is  
75 embedded for user operation, data acquisition, and visual display through a user-  
76 modifiable program. This module acquires data from the PD through a 16-bit analog-  
77 to-digital card. Data are exported through a USB or RS232 port to the user's computer.  
78 This module also governs the temperatures, MPs, SP, AP, and mass flow controller  
79 (MFC). The temperatures are monitored using high precision temperature probes  
80 PT100 and maintained constantly by PID. Data exports through the USB or RS232 to  
81 personal computer.

82 The liquid delivery module consists of four solenoid micro-pumps MPs (Bio-Chem  
83 Valve Inc., Boonton, NJ, USA) and one syringe pump SP (NKP-DA-S04Y, Karmoor).

The operating time of the solenoid micro-pumps delivering the solutions and samples is fixed at 0.2 second while the turn-off time is alternative and flexible to maintain different flow rates. The first MP (MP1) is set at a flow rate of 0.5 mL/min; this MP aspirates and dispenses the stripping solution (SS). The third MP (MP3) is fitted at the same flow rate; this MP delivers derivatization solution (DS). The second MP (MP2) aspirates the sample solution downstream of the SC, mixes that solution with the derivatization solution, and dispenses the resulting solution into the HR. The fourth MP (MP4) delivers the reaction product into the detection module. Resulting liquid waste is vented through a syringe pump SP.

In the sampling module, the air is driven by an air pump AP (DC 24V, Nidec) and then the extraction of the HCHO occurs in a glass stripping coil SC. The gas flow rate is set at 0.7 L/min and the residence time of the sampled gas passing through the SC is approximately 0.2 s. Construction of the SC is shown in Figure S1. The stripping solution SS and the air are brought into contact continuously in a flow manifold at the beginning of the coil. A glass tube (inner diameter 3 mm), coiled in five spiral turns (coil diameter 22 mm), is applied to the stripping of ambient HCHO. The visualization design allows us to examine if the AP and MPs work well during operations. At the end of the coil there is a gas–liquid separator connected where gas and liquid flow are separated. Stripping solution and sample solution are controlled through MP1 and MP2. Temperature is controlled at 20°C with cycling water in a double wall glass cylinder WB cooled by a simple refrigeration unit CD, in order to prevent inaccuracies in

sampling caused by fluctuating external temperatures. A water trap WT for gas-liquid separation and a water filter WF are further connected to the coil before the air pump to protect the pump.

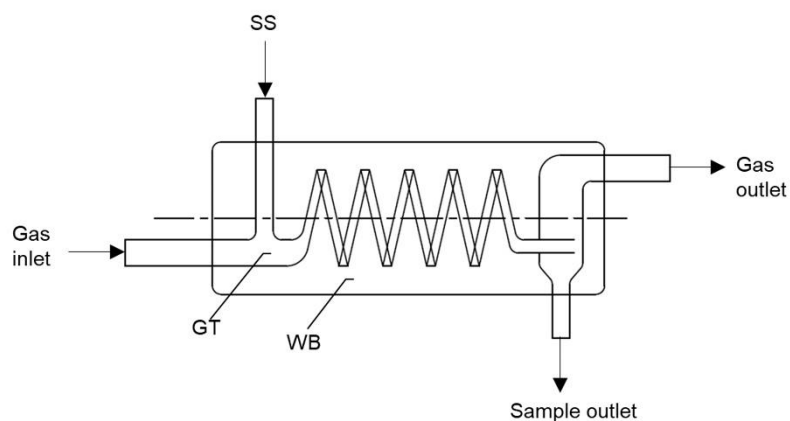

**Figure S1.** Construction of the glass stripping coil. GT, glass tube; WB, water bath.

In the reaction module, derivatization solution DS is delivered by MP3 and mixing with sample solution from MP2 in a Y-type mixing tee MT (ID 1.5mm). Then the mixtures are aspirated into the heated reactor HR. The HR is made of 2 m 1/16'' (ID 1.0mm) PTFE tubing twined on a stainless-steel cylinder embedding a heating rod and a temperature sensor. The residence time of the reaction solutions in the HR is approximately 94 s at a liquid flow of 1.0 mL/min for sufficient reaction. The whole assembly is put with insulating foam inside a plastic enclosure to make sure the temperature is constant.

Reaction product goes through a tiny debubbler DB made of glass and then is driven by MP4 to a filter with 1 $\mu$ m PTFE membrane (Acrodisc CR 25mm Syringe filter with 1 $\mu$ m PTFE Membrane, Pall Filter Co., Ltd.) before proceeding to the detection module.

The detection module mainly includes a Liquid Waveguide Capillary Cell (LWCC, 0.55 mm I.D., World Precision Instrument, FL, USA), a light source (LS), a photodetector (PD,  $\lambda=150\sim550$  nm,  $\lambda_p=440$  nm, Thorlabs, USA), two silica optical fibers (OFs, 400  $\mu$ m diameter) and an insulated metal capsule (MC) equipped with temperature-control device. LS is composed of a high-intensity light emitting diode (LED, 415 nm, Luxeon Star, USA) and a low power instrumentation amplifier (INA129UA, Texas Instruments Inc., USA). A narrow-band filter (415 nm, Spectrogon, Sweden) is placed in the PD to reduce scattered light. Inside the LWCC, 415-nm light emitted by the LED entered the intersection port through OF1 connecting with the liquid line. Light and product solution is vented through another intersection port; Light then goes through OF2 and is detected by PD while sample solution discharges as waste. Optical signals are converted into voltage signals after detected. To avoid temperature fluctuations leading to refractive index variations of the sample solution and absorption fluctuations of light, the LS and PD are embedded in a dark metal box MC and kept in a constant temperature of 35 °C.

Better response together with lower deviation can be obtained when the liquid flow rates of stripping solution and derivatization solution are close to each other (see Figure S2). As a result, we generally chose a rate of around 0.5 mL/min comparable to the Hantzsch-Flu both for the two solutions to ensure more sensitive response. The reaction temperature also has significant effect on the response because higher temperature leads to shorter reaction time and more sensitive response as shown in Figure S3. It is easy

142 to generate bubbles if the temperature is too high, so a reaction temperature of 75 °C is  
143 available and suitable.

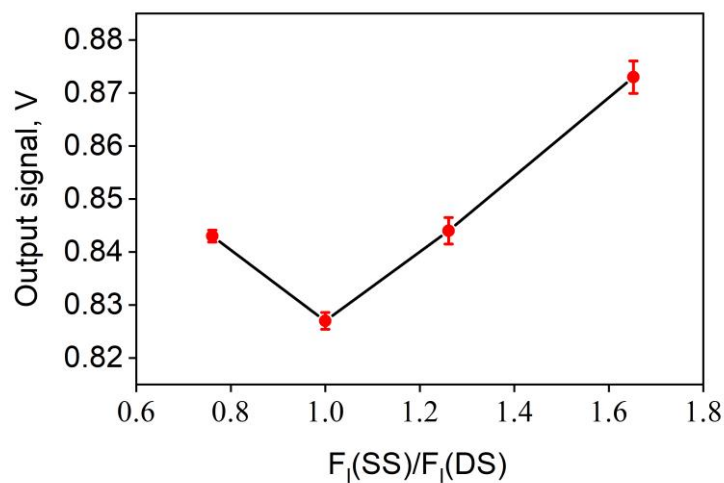

144

145 **Figure S2.** Signal response versus different ratios of liquid flow rate between of  
146 stripping solution,  $F_1(SS)$  and derivatization solution,  $F_1(DS)$ . Liquid flow rate of  
147 stripping solution was fixed at 0.5 mL/min.

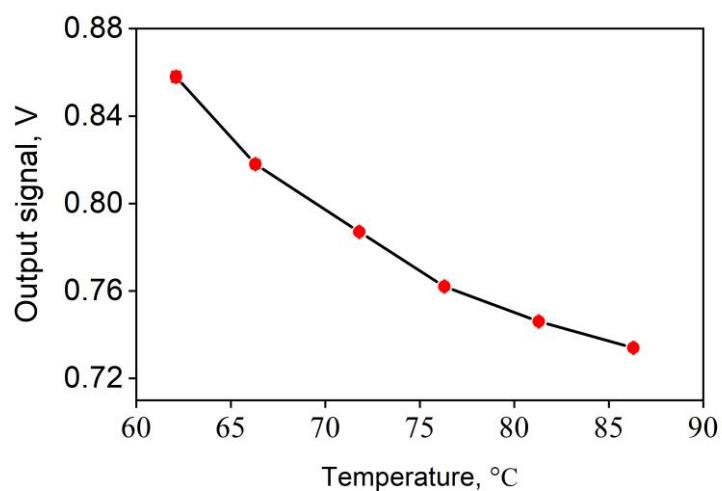

148

149 **Figure S3.** Signal response versus temperature of the reactor.



## 150    **Text S2. Reagents**

151        The stripping solution (SS) was 55 mmol/L H<sub>2</sub>SO<sub>4</sub> by 15 mL sulfuric acid (95%~98%,  
152    Guaranteed Reagent, XILONG SCIENTIFIC) dissolving in 5 L Milli-Q water (18.2  
153    MΩ cm at 25 °C, Millipore). Derivatization solution (DS) was prepared by mixing 10  
154    mL acetyl acetone (99%, Analytical Reagent, XILONG SCIENTIFIC), 12.5 mL acetic  
155    acid (99.5%, Analytical Reagent, Beijing Chemical Works) and 385g ammonium  
156    acetate (98%, Analytical Reagent, XILONG SCIENTIFIC) in 5 L Milli-Q water (18.2  
157    MΩ cm at 25 °C, Millipore). The derivatization solution was stored refrigerated at 10 °C  
158    to stabilize for more than 12 hours before use. For uninterrupted operation, stripping  
159    solution and derivatization are necessary to be replaced every six days.

160

## 161    **Text S3. Calibration and calculations**

162        The photodetector response was measured by delivering standard solutions of HCHO  
163    (within the linear detection range of 0 – 100 µg/L) through MP1 and sampling zero air  
164    during calibrations. The standard solutions were highly diluted solutions of a high-  
165    concentration stock HCHO solution dissolved in stripping solution and prepared fresh  
166    before use. The stock solution was prepared by diluted 500 µL 37% HCHO solution  
167    (37% solution in H<sub>2</sub>O, stabilized with MeOH, J&K Scientific) to 500 mL with Milli-Q  
168    water (18.2 MΩ cm at 25 °C, Millipore) and kept in a refrigerator. According to the  
169    Lambert-Beer law (Eq. (1)):

$$A = \text{Log}_{10} \frac{I_0}{I} = \varepsilon lc \quad (1)$$

170 The concentrations VS.  $\text{Log}_{10} \frac{I_0}{I}$  was linear curve, where  $A$  denotes the absorbance  
 171 signal,  $I_0$  represents the average output signal (V) of zero air,  $I$  is that of HCHO  
 172 solution at certain concentration,  $\varepsilon$  is the molar extinction coefficient,  $l$  is the optical  
 173 path length and  $c$  is the concentration of HCHO (mol/L). Routine calibration of the  
 174 instrument is conducted by working standard solutions of HCHO with concentration  
 175 range of 0 – 100  $\mu\text{g/L}$  (corresponding to 0 – 60 ppbv). The correlation for the linear fit  
 176 of the calibration curve can be better than 0.99 ( $R^2$ ) as shown in Figure S4.

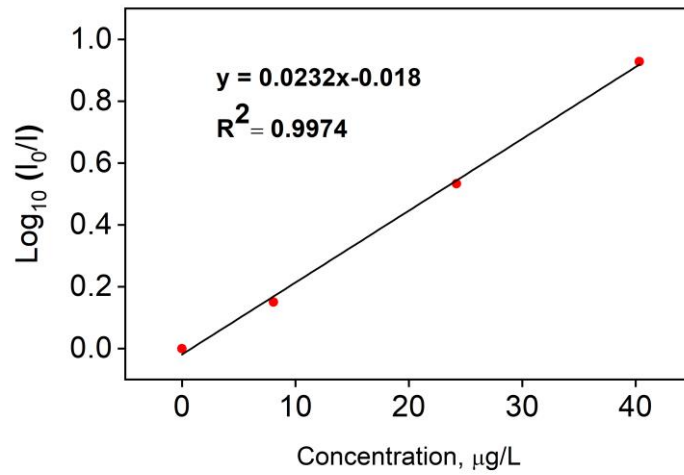

178  
 179 **Figure S4.** Calibration of the Hantzsch-Abs by HCHO standard solutions.

180 From the HCHO concentration in the liquid sample ( $C_{\text{HCHO}}$ ,  $\mu\text{g/L}$ ), the ambient  
 181 mixing ratio of HCHO ( $C_{\text{HCHO}}$ , ppbv) can be calculated by the following Eq. (2):

$$C_{\text{HCHO}} = \frac{C_{[\text{HCHO}]} F_l RT}{M_{\text{HCHO}} F_g P \gamma} \quad (2)$$

where,  $P$  denotes the atmospheric pressure (101kPa),  $M_{HCHO}$  (g/mol) is the molecular weight of HCHO,  $T$  (K) is the sampling temperature and  $\gamma$  is the real sampling efficiency.

#### **Text S4. Sampling efficiency**

Laboratory experiments were carried out to determine the sampling efficiency of the stripping coil. Diluted HCHO gases were sampled using a Hantzsch-Abs connected to the commercial Hantzsch-Flu instrument in series. HCHO gases were generated and diluted using a Dynacalibrator (Model 500, Valco Instruments Co. Inc., USA) with Dynacal permeation devices (FORMALDEHYDE-PARA, 15 ng/min  $\pm$  50% at 50°C and 201 ng/min  $\pm$  50% at 70°C, Valco Instruments Co. Inc., USA). High-purity nitrogen ( $N_2$ ) was used as a carrier gas. The liquid flow rate ( $F_l$ ) was held constant at 0.5 mL/min; the sampling temperature of the stripping coil and the reaction temperature were maintained at 20°C and 75°C, respectively. Derivatization solution was stored in a refrigerator at 10°C. The sampling efficiency ( $\gamma$ ) was deduced by comparison of HCHO concentrations observed using both instruments, using the following Eq. (3):

$$\gamma = \frac{C_1}{C_2 + C_1} \times 100\% \quad (3)$$

where  $C_1$  denotes the concentrations (ppbv) of HCHO observed by the Hantzsch-Abs and  $C_2$  (ppbv) denotes the concentrations observed by the Hantzsch-Flu. The sampling efficiency of the Hantzsch-Abs was calculated to be  $98.5 \pm 0.1\%$  under a

typical gas flow rate of 0.7 L/min, which is comparable to the sampling efficiency of the commercial Hantzsch-Flu instrument.

#### **Text S5. Stability and sensitivity**

Baseline drift is a common problem that affects the stability and sensitivity of Hantzsch methods. We applied an LWCC with an optical path length of 50 cm and an internal volume of 125  $\mu$ L to the Hantzsch-Abs. The maximum voltage signal output from the Hantzsch-Abs was 3.3 V (under no absorbance); we chose 68% of the maximum voltage as the baseline signal. After 12 h of continuous baseline monitoring (system blanks, obtained by sampling no gas, averaged  $2.26 \pm 0.01$  V), baseline signals dropped marginally, by 0.7%; this was within a reasonable range for long-term monitoring. However, we recommend baseline monitoring at the beginning and end of every measurement period, or every 12 h during continuous long-term measurements, to reduce the effect of baseline drift. The drift is corrected based on the gradient subtraction between the averaged concentrations calculated from baseline monitoring before and after each measurement as the following Eq. (4):

$$[HCHO]_{corrected} = [HCHO]_{original} - zero_1 - \frac{zero_2 - zero_1}{Gt} \times Dt \quad (4)$$

Where,  $[HCHO]_{corrected}$  is the HCHO concentration corrected for the drift, ppbv;  $[HCHO]_{original}$  is the HCHO concentration without correction, ppbv;  $zero_1$  is the averaged zero concentration calculated from baseline monitoring before measurement,

220 ppbv;  $zero_2$  is the averaged zero concentration calculated from baseline monitoring after  
221 measurement, ppbv;  $Gt$  is the duration of the measurement, s;  $Dt$  is the data acquisition  
222 frequency, s.

223 The liquid-phase performances at 18.5, 37, and 74  $\mu\text{g/L}$  HCHO, determined by  
224 quickly switching between HCHO solutions and stripping solution, are shown in Figure  
225 S5. The time resolution (i.e., the time the instrument needs to rise from 10% to 90% of  
226 the full signal,  $t_{10}-t_{90}$ ) was approximately 100 s, calculated using 10–90% of the full  
227 signal after a change in concentration. The delay time (the time the instrument needs to  
228 rise from 0 to 90% of the full signal,  $t_0-t_{90}$ ) was 150 s. The relative standard deviation  
229 calculated from three consecutive measurements ranged from 0.3% to 0.7%.

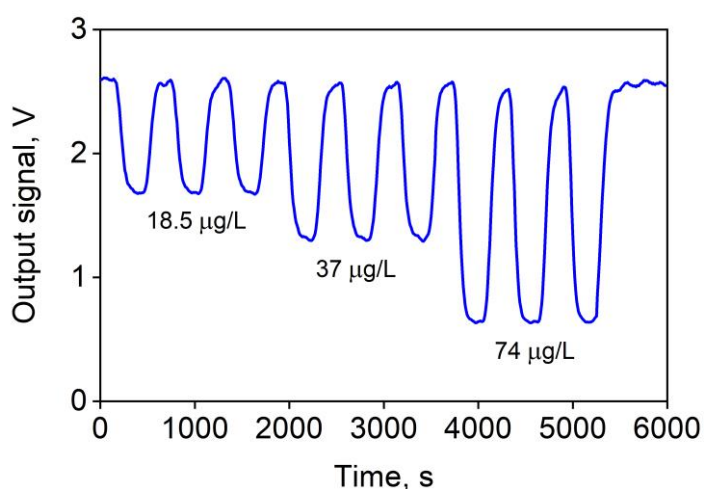

230  
231 **Figure S5.** Liquid phase system performance by switching the HCHO solutions and  
232 stripping solution.  
233

## **Text S6. Interference by other compounds**

Interference by other compounds in the air, such as other oxygenated VOCs, is a contentious issue when utilizing Hantzsch methods. We conducted laboratory experiments to explore potential interference by acetaldehyde, acetone, and ethanol. We defined relative interference ( $\alpha$ ) as the interference signal and measured this parameter as HCHO concentration (ppbv) divided by the mixing ratio of the interfering compound ( $\alpha = 100 \times [\text{ppbv-signal HCHO} / \text{ppbv-compound}]$ ). All values corresponded to typical operating conditions under a gas flow rate of 0.7 L/min and a liquid flow rate of 0.5 mL/min.

Acetaldehyde interference was determined using acetaldehyde solutions ranging from 15.6 to 78.0  $\mu\text{g/L}$  (corresponding to 6.7–33.3 ppbv in the gas phase). Each solution was tested for 20 minutes and solutions were prepared by dissolving an acetaldehyde solution (40% solution in  $\text{H}_2\text{O}$ , J&K Scientific) in 40  $\mu\text{g/L}$  HCHO standard solution. Interference was below the limit of detection at a concentration of 6.7 ppbv, whereas concentrations of 16.6 and 33.3 ppbv led to HCHO signals of 0.4 and 0.3 ppbv ( $\alpha$  of 1.7% and 1.1%), respectively. Ethanol solutions were prepared by dissolving ethanol (99.9%, ACS/HPLC Certified, J&K Scientific) in 40  $\mu\text{g/L}$  HCHO standard solution. Ethanol had no detectable signal at 9.5 and 47.4  $\mu\text{g/L}$  (3.8 and 19 ppbv); however, at 94.8  $\mu\text{g/L}$  (38.0 ppbv), ethanol resulted in an average HCHO signal of 0.5 ppbv and  $\alpha$  of  $1.8 \pm 1.1\%$ . For acetone, interference was measured for 1 h using diluted acetone calibration gas (800 ppbv in  $\text{N}_2$ , Messer, Germany) using a Dynamic Gas Calibrator

(Model 146i, Thermo Fisher Scientific Inc.), and was determined to be  $0.3 \pm 0.2\%$ .

These results indicate minor interference effects from acetaldehyde, alcohol, and acetone on HCHO measurements at ambient levels.

**Table S1.** Interferences from acetaldehyde, acetone and ethanol.

| Species      | Concentration<br>(liquid phase) | Concentration<br>(gas phase) | Signal<br>HCHO | Interference<br>( $\alpha$ ) |
|--------------|---------------------------------|------------------------------|----------------|------------------------------|
| Acetaldehyde | 15.6                            | 6.7 ppbv                     | ND             | ND.                          |
|              | 39.0                            | 16.6 ppbv                    | 0.4 ppbv       | $1.7 \pm 1.8\%$              |
|              | 78.0                            | 33.3 ppbv                    | 0.3 ppbv       | $1.1 \pm 1.6\%$              |
| Ethanol      | 9.5                             | 3.8 ppbv                     | ND             | ND                           |
|              | 47.4                            | 19.0 ppbv                    | ND             | ND                           |
|              | 94.8                            | 38.0 ppbv                    | 0.5 ppbv       | $1.8 \pm 1.1\%$              |
| Acetone      |                                 | 800 ppbv                     | 1.4 ppbv       | $0.3 \pm 0.2\%$              |

#### **Text S7. Performances of the measurement ranges and time resolution using reactors in different lengths**

We tested the HCHO solutions ranged from 0 to 180  $\mu\text{g/L}$  under 20-cm and 50-cm reactor cells, which is shown in Figure S6. According the calibration curves, the measurement ranges of 20-cm and 50-cm reactor cell are determined to be 0 – 510 and 0 – 270  $\mu\text{g/L}$  (corresponding to approximately 0 – 160 ppbv and 0 – 300 ppbv), respectively. We also tested the time resolution ( $t_{10} - t_{90}$ ) using a 20-cm reactor cell, which showed a result of 90s.

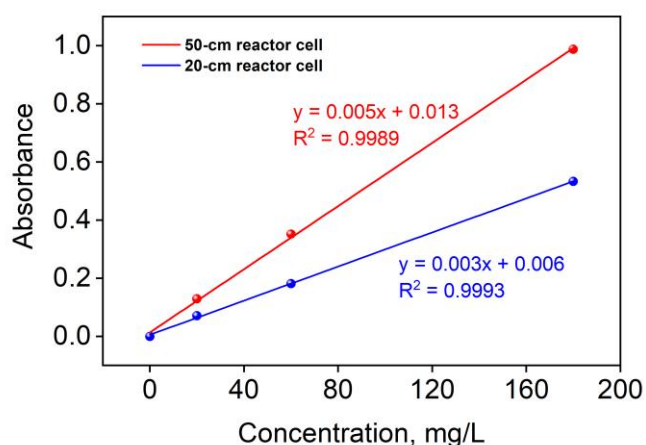

**Figure S6.** Calibration curves under different lengths of reactor cell.

# **Text S8. Power, size and weight of the Hantzsch-Abs and comparison with other instruments**

The whole system is contained in a case machined from aluminum block AL coated by PTFE with a size of 440×440×130 mm. It weighs around 10 kg. Maximum power consumption by the instrument is 220 VAC, 300 watts.

**Table S2.** Comparison of the Hantzsch-Abs and other commercial instruments

|                              | The Hantzsch-Abs        | The Hantzsch-Flu | PTR-Tof-MS     | FTIR <sup>1</sup> |
|------------------------------|-------------------------|------------------|----------------|-------------------|
| LOD                          | 25 pptv                 | 100 pptv         | ~100 pptv      | 0.15 – 1.1 ppmv   |
| Detectable range             | Max 3 ppmv (adjustable) | Max 1 ppmv       | Max 1 ppmv     | /                 |
| Delay time/<br>Response time | 150 s                   | 300 s            | 100 ms         | ≤ 1 s             |
| Size                         | 440×440×130 mm          | 450×150×560 mm   | 600×910×800 mm | 660×1970×970 mm   |
| Weight                       | 10 kg                   | 20 kg            | 125 kg         | 250 – 450 kg      |



|                   |           |      |        |              |
|-------------------|-----------|------|--------|--------------|
| Power consumption | Max 300 W | 110W | 1500 W | max. 4.4 kVA |
|-------------------|-----------|------|--------|--------------|

---

278

279 **Text S9. Location and deployment of field observation**

280 The field observation campaign was located at Pingyuan Meteorological Bureau in  
281 Pingyuan County, Dezhou City, Shandong Province, China (37.15°N, 116.47°E) which  
282 is shown in Figure S7. The PTR-Tof-MS was placed in field container #1 with a  
283 sampling inlet 1 mm in diameter. The Hantzsch-Flu and Hantzsch-Abs were placed  
284 together in field container #2 and shared the same sampling inlet, which was 0.25 inches  
285 in diameter. Both sampling inlets were approximately 3 m above the ground and placed  
286 a few meters apart (Figure S8).

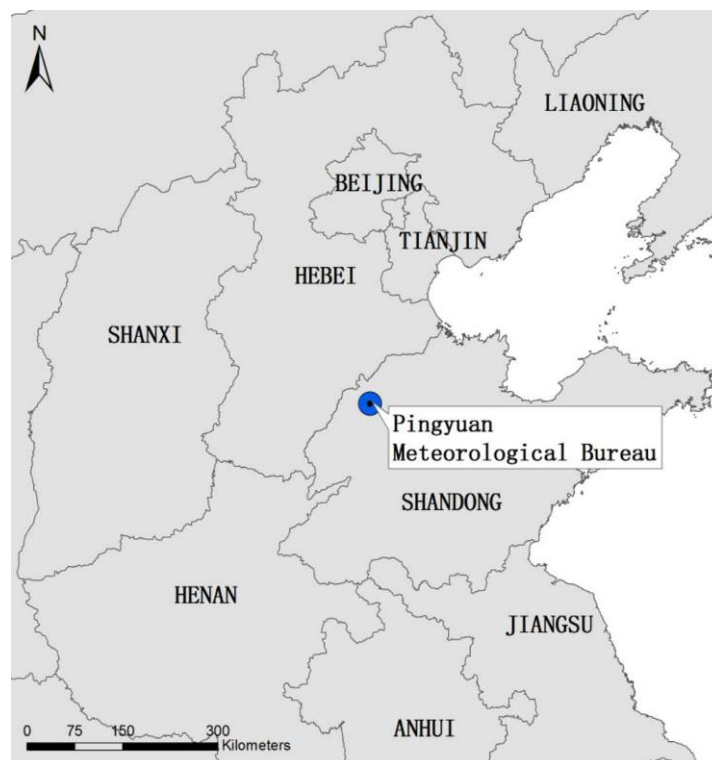

287

288

**Figure S7. Siting of field measurement.**

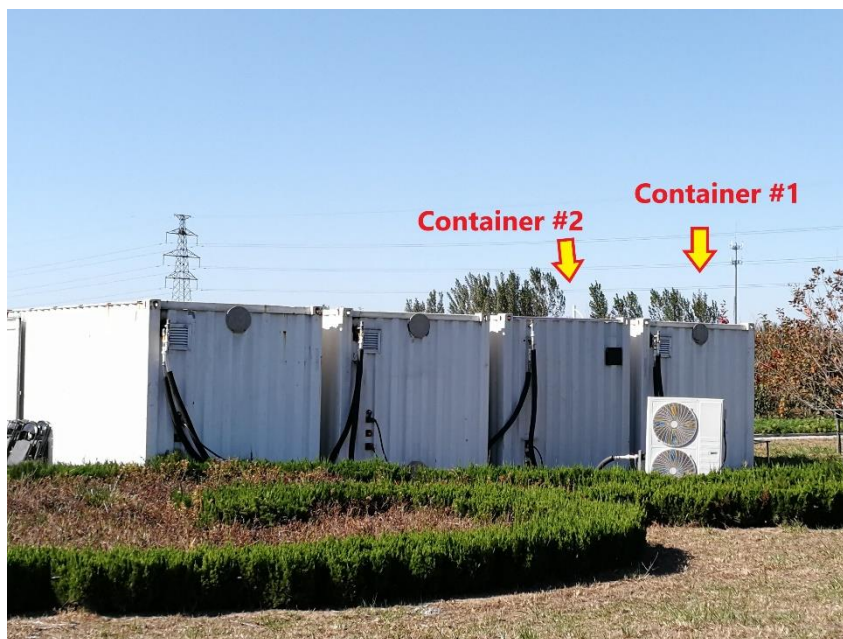

**Figure S8.** Containers of field measurement.

**Text S10. Diurnal variations of HCHO and acetonitrile concentrations**

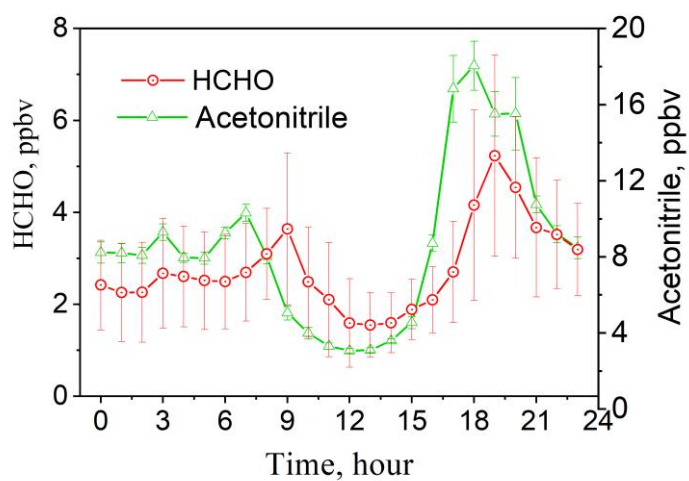

**Figure S9.** Diurnal variations of HCHO and acetonitrile concentrations during December 15 and December 21.

**Text S11. Description of the sampling and pretreatment system**

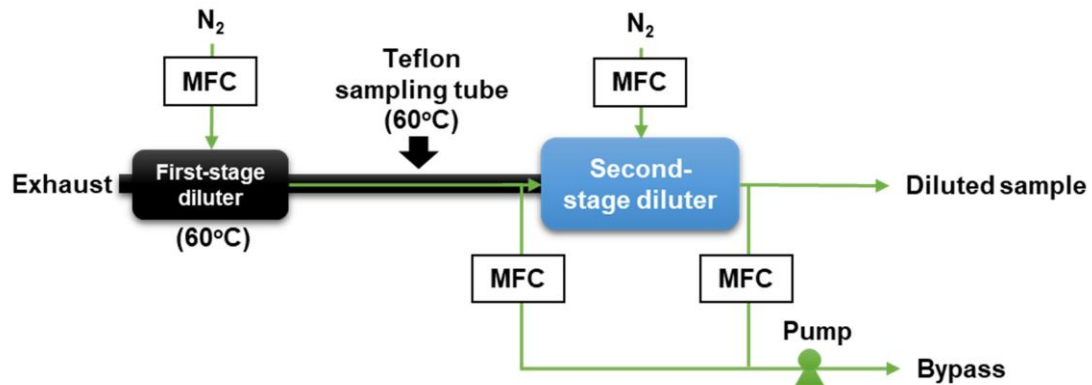

**Figure S10.** System schematic for the sampling and dilution system. MFC, mass flow controller.

The sampling and dilution system includes two diluters, Teflon sampling tube, four mass flow controllers (MFC) and an air pump. The first-stage diluter is embedded near the sampling port at the Teflon sampling tube, and both of them keep at an elevated temperature of 60°C, which can prevent the loss of HCHO due to rapid condensation of the exhaust. The sampling tube wrapped in thermal insulation material not only reduces the loss of HCHO due to rapid condensation of the exhaust but also avoid the effects of light. The second-stage diluter is following the Teflon sampling tube, offering a higher dilution for the sample. Nitrogen (N<sub>2</sub>) is used as the dilution gas and regulated by MFCs into the two diluters. Exhaust is driven by the pump and regulated by another two MFCs set in the bypass, so that the sample would not be affected by MFCs. By adjusting the MFCs, the dilution ratio can be set up to 100.

**Text S12. Test vehicles**

**Table S3.** Specifications of the test vehicles.

|                       | Light-duty diesel truck      | Light-duty gasoline vehicle |
|-----------------------|------------------------------|-----------------------------|
| Emission standard     | China III                    | China V                     |
| Odometer, km          | 173046                       | /                           |
| Engine capacity, L    | 2800                         | 1587                        |
| Exhaust control       | None                         | Three-way catalyst          |
| Fuel injection system | Common-rail Direct Injection | Multi Point Injection       |

314

315

316     **Reference**

- 317     (1)     Suarez-bertoa, R.; Clairotte, M.; Suarez-bertoa, R.; Clairotte, M.; Arlitt, B.;  
318             Nakatani, S.; Hill, L.; Winkler, K.; Kaarsberg, C.; Knauf, T.; et al.  
319             Intercomparison of Ethanol , Formaldehyde and Acetaldehyde Measurements  
320             from a Flex-Fuel Vehicle Exhaust during the WLTC Intercomparison of  
321             Ethanol , Formaldehyde and Acetaldehyde Measurements from a Flex-Fuel  
322             Vehicle Exhaust during the WLTC. *Fuel* **2017**, *203* (May), 330–340.  
323             <https://doi.org/10.1016/j.fuel.2017.04.131>.

324
